# Supplementary material
Source: HighWire-hosted journal article supplement (https://www.cfp.ca/highwire/filestream/35377/field_highwire_adjunct_files/0/266_Figure1.pdf)

Figure 1

# Pregnancy & Anti-seizure Drugs

Women who take anti-seizure drugs need to plan well ahead for pregnancy

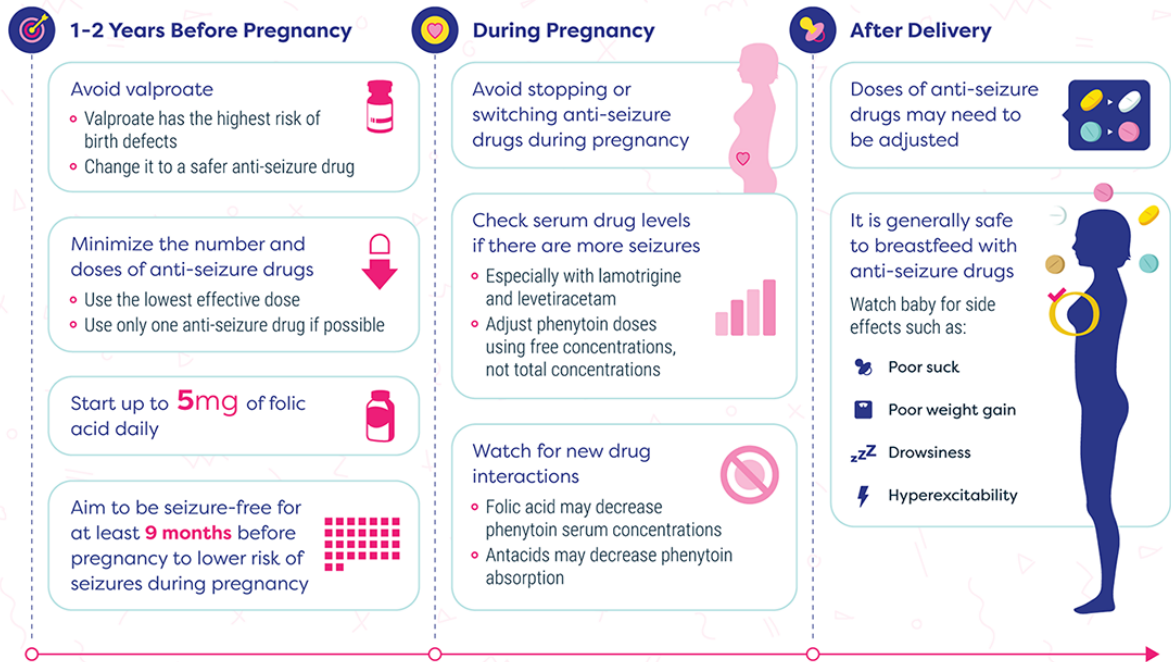

Supplement: 266_Figure1.pdf [file 266_Figure1.pdf]
